# Supplementary material for: Arctigenin improves neuropathy via ameliorating apoptosis and modulating autophagy in streptozotocin‐induced diabetic mice
Source: PubMed Central journal article supplement (PMC10493658; doi:10.1111/cns.14249), 2023-05-11
Supplement: CNS-29-3068-s001.pdf [file CNS-29-3068-s001.pdf]

Supplementary Material S1 Original western blot details

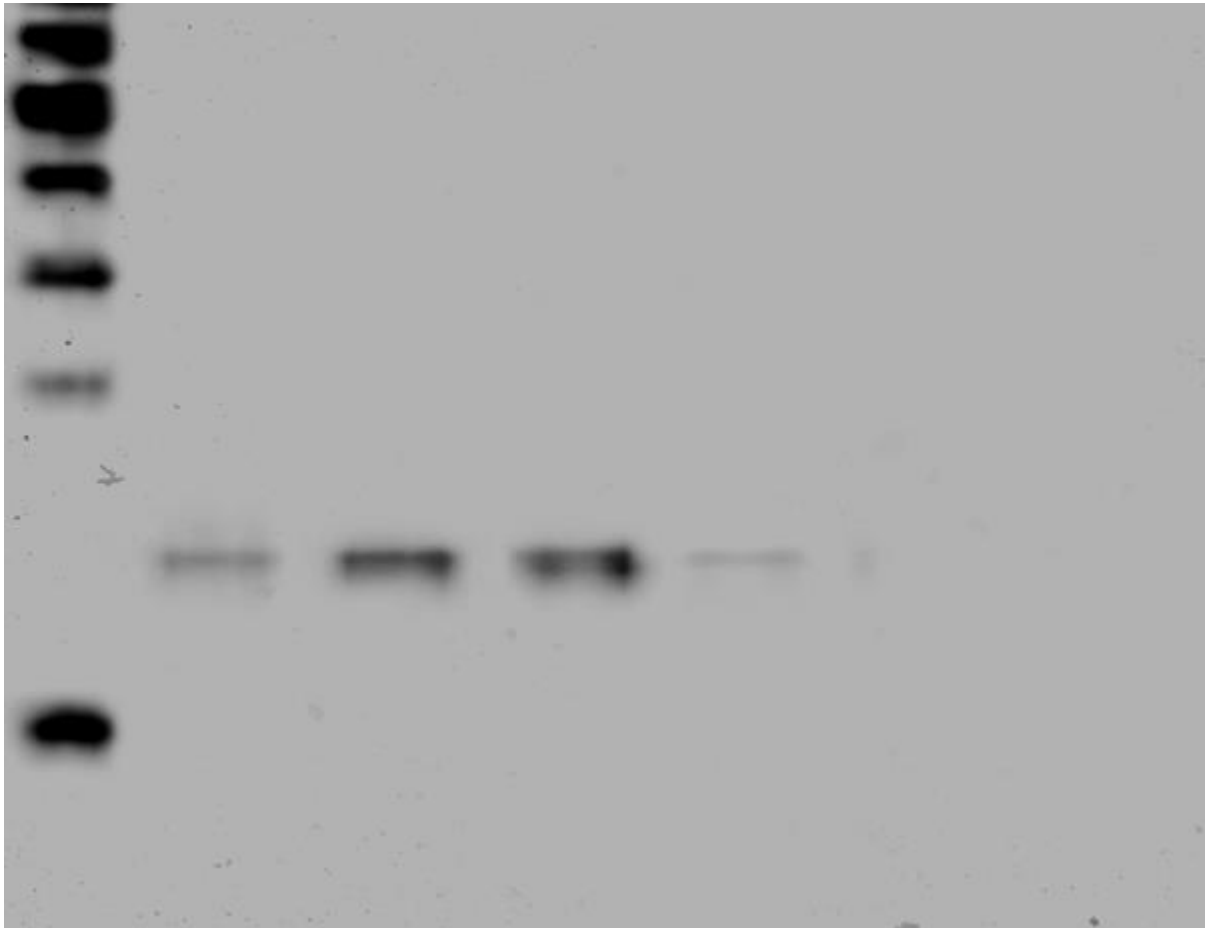

Figure S1.1. : The uncropped, untouched, full original image of western blot presenting BAX

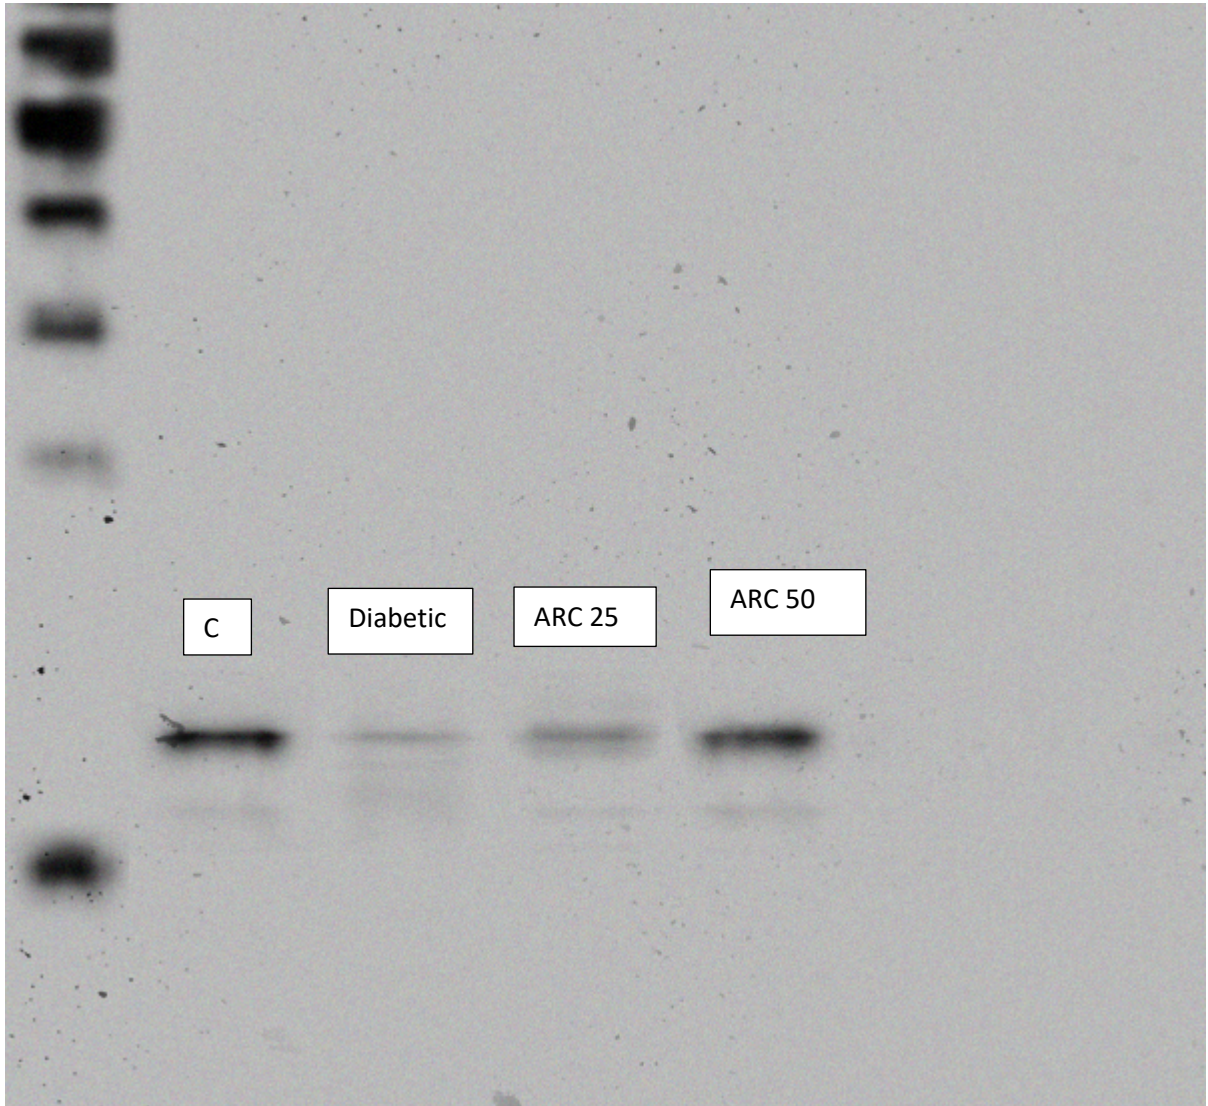

Figure S1.2. : The uncropped, untouched, full original image of western blot presenting BCL2

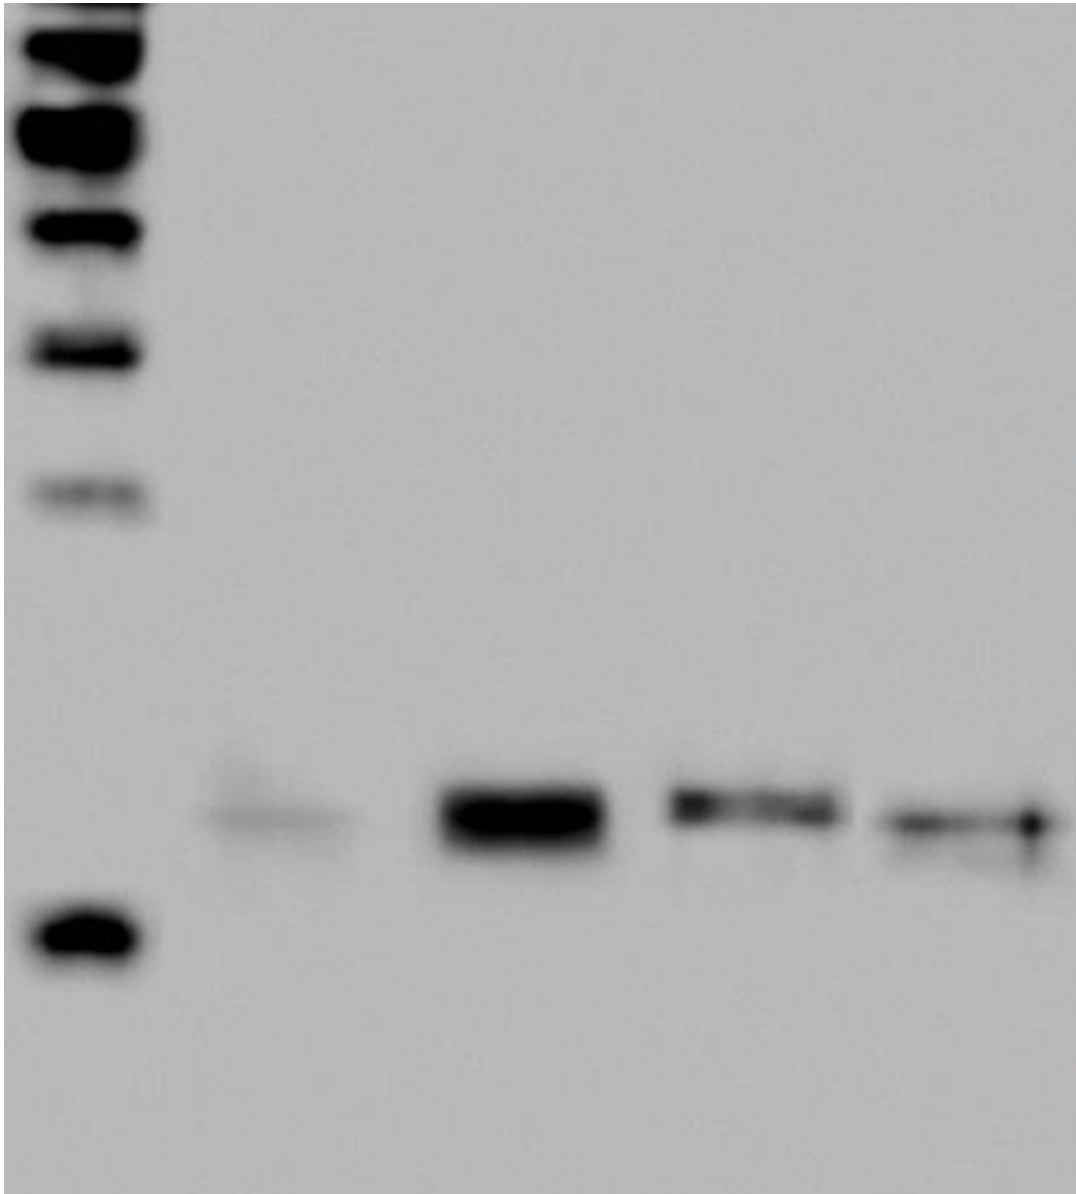

Figure S1.3. : The uncropped, untouched, full original image of western blot presenting cleaved caspase 3

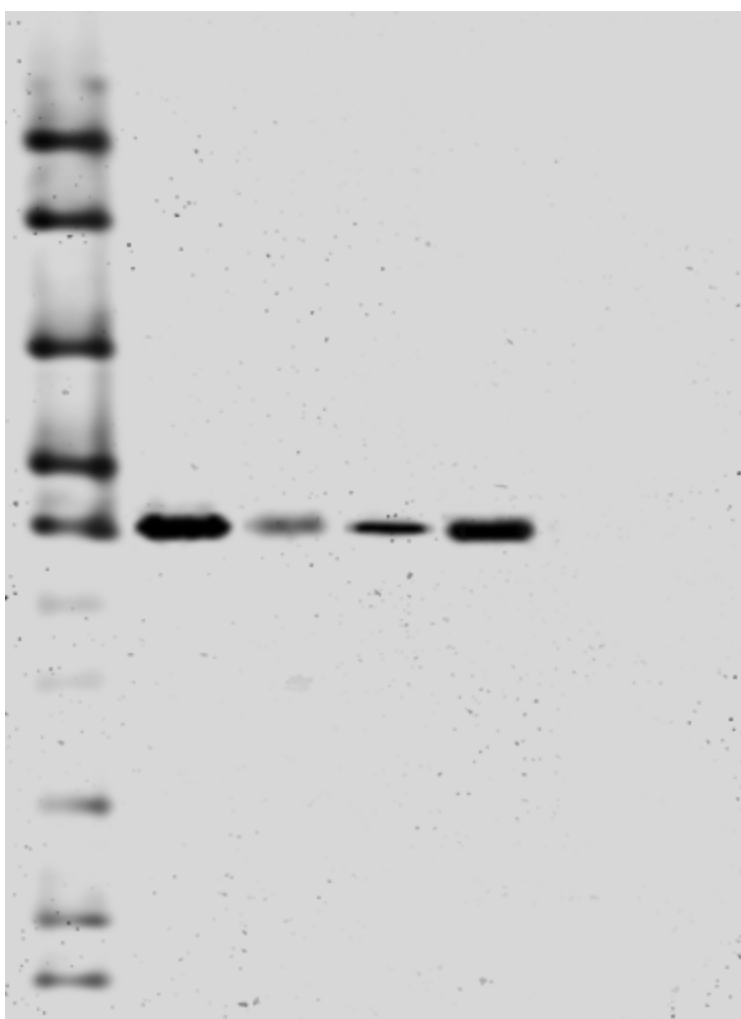

Figure S1.4. : The uncropped, untouched, full original image of western blot presenting Beclin

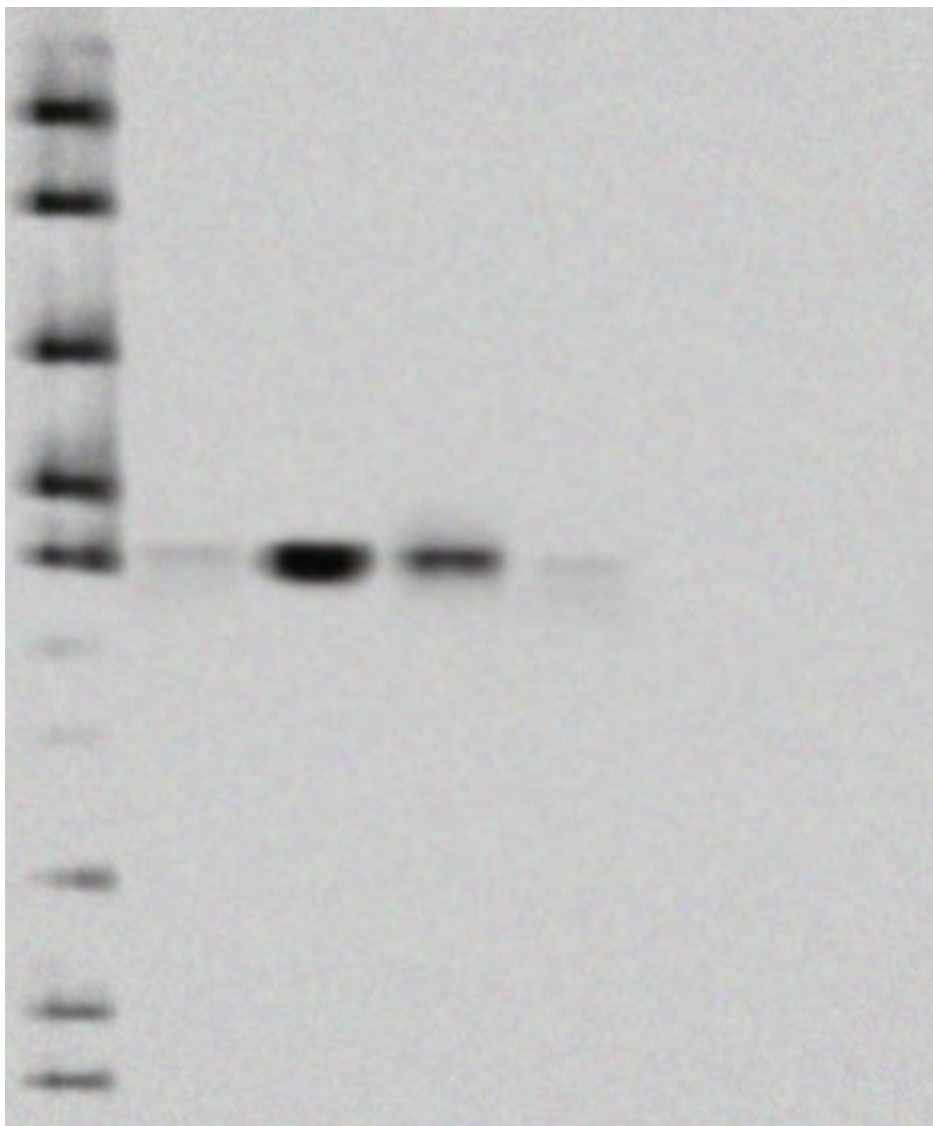

Figure S1.5. : The uncropped, untouched, full original image of western blot presenting p62

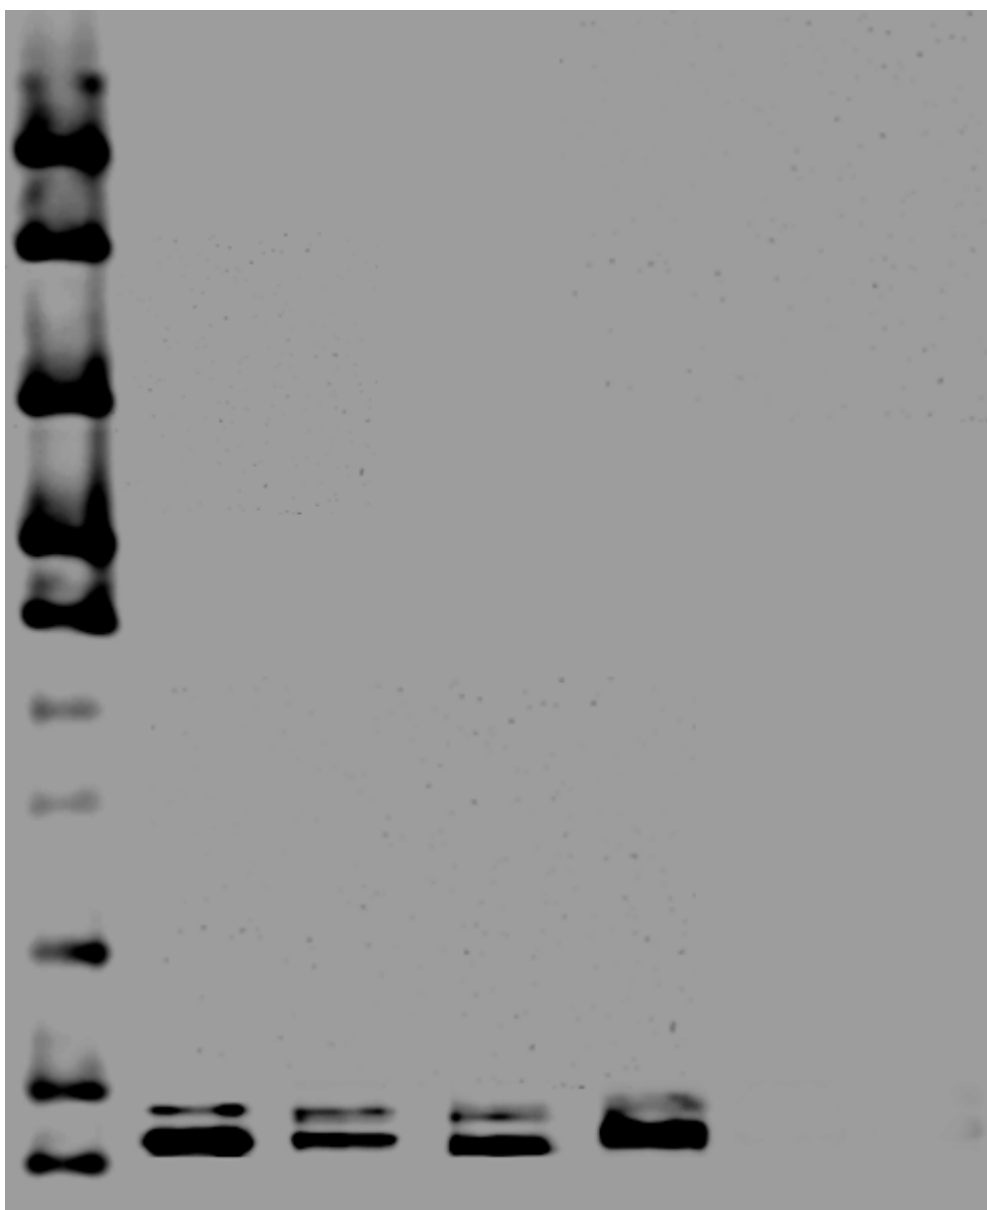

Figure S1.6. : The uncropped, untouched, full original image of western blot presenting LC3

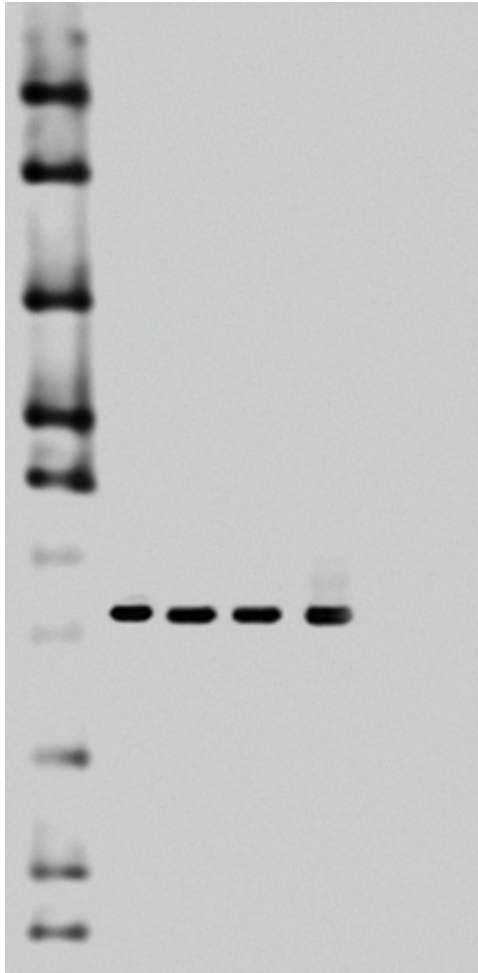

Figure S1.7. : The uncropped, untouched, full original image of western blot presenting B-actin

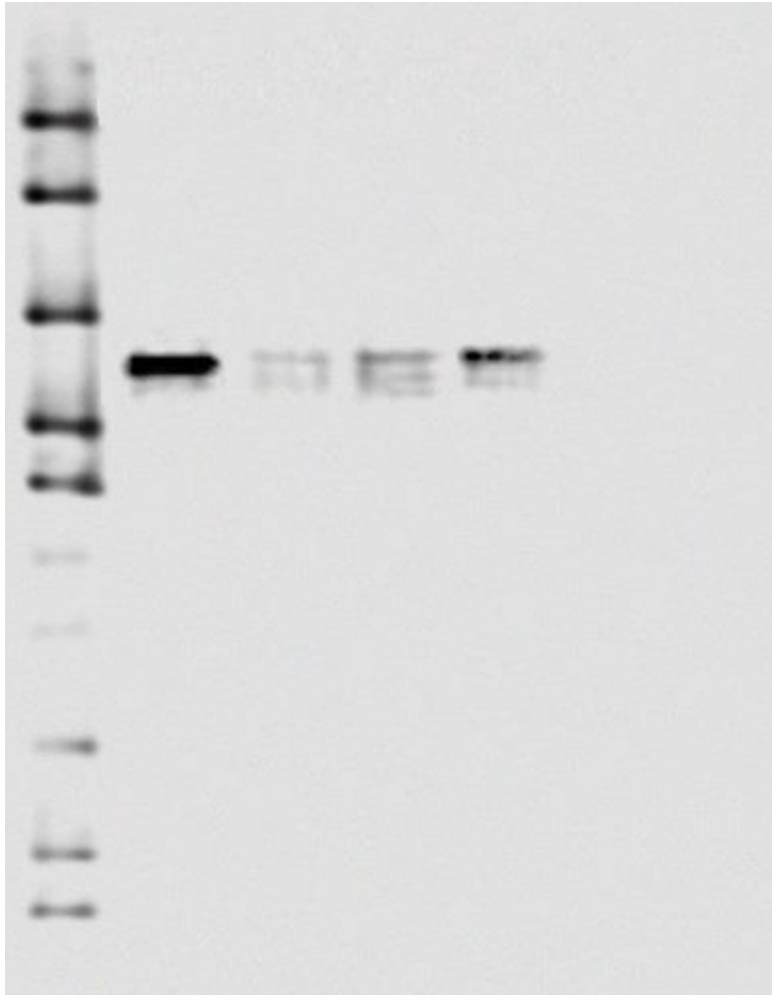

Figure S1.8. : The uncropped, untouched, full original image of western blot presenting AMPK
